# Supplementary material
Source: publisher site journal article supplement (http://www.e-cmh.org/upload/media/cmh-2021-0188-suppl8.pdf)
Supplement: Supplementary file 1 [file cmh-2021-0188-suppl8.pdf]

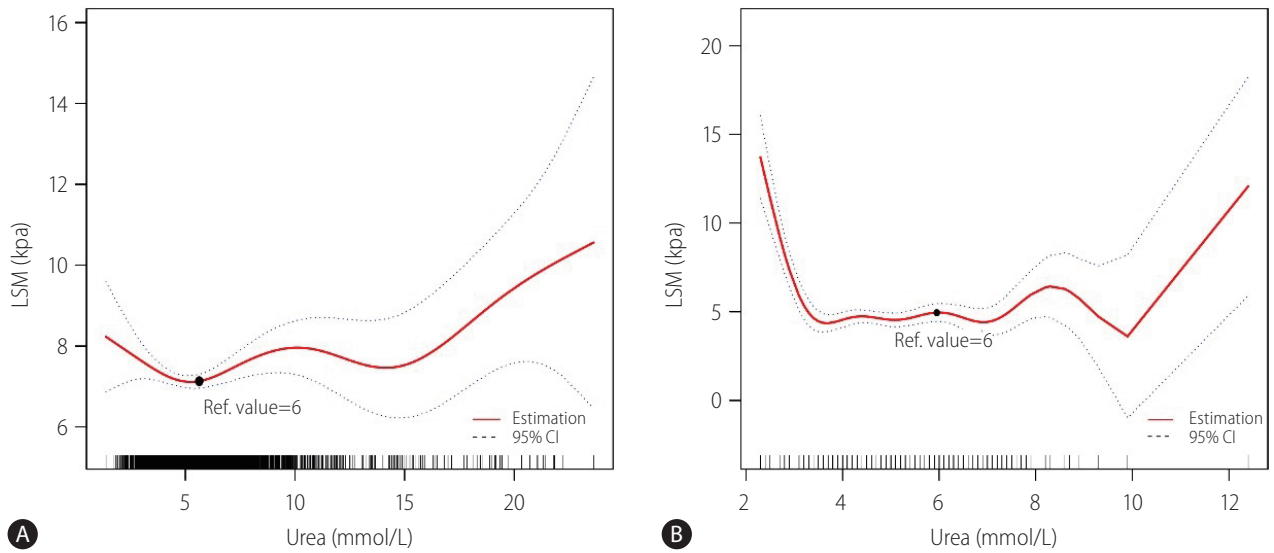

**Supplementary Figure 1.** A non-linear relationship between urea level (mmol/L) and LSM (kPa) in the (A) LSM and (B) MRS cohorts. The LSM was plotted against urea level with a curve indicating the U-shaped relationship between the urea level and LSM after adjustment with patients age, gender, viral hepatitis infection status, NAFLD, alanine transaminase, total bilirubin, and albumin levels. LSM, liver stiffness measurement; Ref., reference; CI, confidence interval; MRS, magnetic resonance spectroscopy; NAFLD, nonalcoholic fatty liver disease.
